# Supplementary material for: Earthworm-invaded boreal forest soils harbour distinct microbial communities
Source: Copernicus journal article supplement (doi:10.5194/soil-9-461-2023), 2023-08-29
Supplement: Supplementary file 1 [file soil-9-461-2023-supplement.pdf]

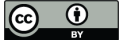

*Supplement of*

## **Earthworm-invaded boreal forest soils harbour distinct microbial communities**

**Justine Lejoly et al.**

*Correspondence to:* Justine Lejoly (j.lejoly@nioo.knaw.nl)

The copyright of individual parts of the supplement might differ from the article licence.

## Supplementary tables

*Table S1. Main site characteristics and key soil properties. Climate data were obtained from Alberta Climate Information Service (2020) for Alberta (AB) and from Environment Canada (2010) for Québec (QC). Total nitrogen (TN) and total organic carbon (TC) were analyzed by the dry combustion method on a ThermoScientific Flash 2000 Organic Elemental Analysis instrument (ThermoFisher Scientific, Waltham, MA, USA).*

| Site                    | Parent material    | MAT [°C] | MAP [mm] | Coordinates         |              | Textural class |                 | Forest floor thickness [cm] |         | CaCl <sub>2</sub> pH |         | TN [%]  |         | TC [%]  |         |
|-------------------------|--------------------|----------|----------|---------------------|--------------|----------------|-----------------|-----------------------------|---------|----------------------|---------|---------|---------|---------|---------|
|                         |                    |          |          |                     |              | Control        | Invaded         | Control                     | Invaded | Control              | Invaded | Control | Invaded | Control | Invaded |
| Luvisol (EMEND)         | Glacial till       | 1.4      | 413      | 56°46'N<br>118°22'W | Forest floor |                |                 | 10.7                        | 7.7     | 5.6                  | 5.7     | 2.29    | 1.86    | 43.0    | 38.7    |
|                         |                    |          |          |                     | Mineral soil | Loam           | Loam            |                             |         | 5.2                  | 5.4     | 0.14    | 0.20    | 1.7     | 2.6     |
| Brunisol (Valcartier)   | Fluvial deposit    | 1.6      | 1460     | 46°55'N<br>71°36'W  | Forest floor |                |                 | 7.8                         | 3.1     | 3.2                  | 4.8     | 1.99    | 1.48    | 45.1    | 35.4    |
|                         |                    |          |          |                     | Mineral soil | Sandy loam     | Clay loam       |                             |         | 3.1                  | 4.3     | 0.46    | 0.49    | 7.8     | 7.7     |
| Podzol (Grands Jardins) | Sandy glacial till | 3.7      | 930      | 47°40'N<br>70°50'W  | Forest floor |                |                 | 10.5                        | 5.3     | 3.0                  | 3.7     | 1.40    | 1.31    | 48.9    | 42.3    |
|                         |                    |          |          |                     | Mineral soil | Sandy loam     | Sandy clay loam |                             |         | 3.4                  | 4.6     | 0.15    | 0.27    | 4.1     | 6.1     |

Table S2. Average ( $\pm 1$  SE) relative abundances (%) of the fungal and bacterial phyla accounting for > 1% of relative abundance (n=7–18). Different letters represent significant differences between control and earthworm invaded soils ( $p$ -value < 0.1) and are presented separately for the forest floors and mineral soils.

|                   | Forest floor |              | Mineral soil |              |
|-------------------|--------------|--------------|--------------|--------------|
|                   | Control      | Invaded      | Control      | Invaded      |
| <b>Fungi</b>      |              |              |              |              |
| Ascomycota        | 57.7 (4.8) a | 60.3 (2.6) a | 67.9 (4.3) a | 56.3 (3.3) b |
| Basidiomycota     | 28.0 (4.0) a | 26.7 (1.9) a | 20.5 (4.3) a | 26.9 (2.8) a |
| Chytridiomycota   | 1.5 (0.6) a  | 1.6 (0.4) a  | 2.2 (1.0) a  | 2.0 (0.6) a  |
| Mortierellomycota | 5.4 (2.0) a  | 2.9 (0.8) a  | 1.4 (0.6) a  | 2.6 (0.8) a  |
| Mucoromycota      | 0.9 (0.3) a  | 0.7 (0.3) a  | 3.1 (2.3) a  | 1.7 (1.0) a  |
| <b>Bacteria</b>   |              |              |              |              |
| Acidobacteriota   | 13.6 (2.0) a | 13.3 (1.0) a | 26.9 (1.7) a | 22.7 (1.2) b |
| Actinobacteriota  | 31.7 (3.0) a | 24.8 (2.0) b | 17.2 (1.9) a | 16.6 (1.4) a |
| Bacteroidota      | 7.5 (1.8) a  | 9.8 (1.3) a  | 1.0 (0.4) b  | 1.9 (0.5) a  |
| Chloroflexi       | 1.5 (0.4) a  | 1.4 (0.3) a  | 9.1 (1.1) a  | 8.4 (1.0) b  |
| Firmicutes        | 2.3 (1.6) a  | 1.9 (1.0) a  | 2.5 (0.8) a  | 1.9 (0.4) a  |
| Gemmatimonadota   | 0.3 (0.2) a  | 0.3 (0.1) a  | 1.4 (0.5) a  | 1.9 (0.4) a  |
| Planctomycetota   | 12.3 (2.2) a | 13.4 (1.7) a | 17.2 (1.2) a | 19.2 (1.1) a |
| Proteobacteria    | 27.2 (2.1) a | 29.9 (1.9) a | 16.7 (1.0) b | 18.7 (0.8) a |
| Verrucomicrobiota | 2.2 (0.4) b  | 3.1 (0.4) a  | 6.2 (1.1) a  | 6.4 (0.7) a  |

Table S3. Two-way analyses of variance (factors: earthworm invasion and site) of fungal guild and phylum relative abundances (as number of reads), fungal ratio, and diversity indices, for forest floors and mineral soils separately. Df stands for degrees of freedom and Sum sq for sum of squares.

|                                     | FOREST FLOOR |         |         |         | MINERAL SOIL |         |         |         |
|-------------------------------------|--------------|---------|---------|---------|--------------|---------|---------|---------|
|                                     | Df           | Sum Sq  | F value | p-value | Df           | Sum Sq  | F value | p-value |
| <b>Fungal guilds</b>                |              |         |         |         |              |         |         |         |
| <b>Ectomycorrhizae</b>              |              |         |         |         |              |         |         |         |
| Invasion                            | 1            | 0.00    | 0.00    | 0.96    | 1            | 0.49    | 13.94   | <0.01   |
| Site                                | 2            | 1.06    | 15.51   | <0.001  | 2            | 0.52    | 7.38    | <0.01   |
| Interaction                         | 2            | 0.06    | 0.94    | 0.41    | 2            | 0.02    | 0.31    | 0.74    |
| Residuals                           | 18           | 0.62    |         |         | 21           | 0.74    |         |         |
| <b>Pathogens</b>                    |              |         |         |         |              |         |         |         |
| Invasion                            | 1            | 0.02    | 0.52    | 0.48    | 1            | 0.01    | 0.34    | 0.57    |
| Site                                | 2            | 0.49    | 7.57    | <0.01   | 2            | 0.11    | 3.24    | 0.06    |
| Interaction                         | 2            | 0.02    | 0.36    | 0.70    | 2            | 0.00    | 0.00    | 1.00    |
| Residuals                           | 18           | 0.58    |         |         | 21           | 0.36    |         |         |
| <b>Saprotrophs</b>                  |              |         |         |         |              |         |         |         |
| Invasion                            | 1            | 0.01    | 0.37    | 0.55    | 1            | 0.38    | 11.86   | <0.01   |
| Site                                | 2            | 0.33    | 6.38    | <0.01   | 2            | 0.42    | 6.49    | <0.01   |
| Interaction                         | 2            | 0.05    | 0.99    | 0.39    | 2            | 0.04    | 0.68    | 0.52    |
| Residuals                           | 18           | 0.46    |         |         | 21           | 0.68    |         |         |
| <b>Ectomycorrhizal:Saprotrophic</b> |              |         |         |         |              |         |         |         |
| Invasion                            | 1            | 0.00    | 0.01    | 0.94    | 1            | 0.01    | 12.84   | <0.01   |
| Site                                | 2            | 2.35    | 13.72   | <0.001  | 2            | 0.01    | 7.58    | <0.01   |
| Interaction                         | 2            | 0.10    | 0.58    | 0.57    | 2            | 0.00    | 0.25    | 0.78    |
| Residuals                           | 18           | 1.54    |         |         | 21           | 0.01    |         |         |
| <b>Fungal phyla</b>                 |              |         |         |         |              |         |         |         |
| Ascomycota                          |              |         |         |         |              |         |         |         |
| Invasion                            | 1            | 66.02   | 0.74    | 0.40    | 1            | 891.50  | 4.60    | <0.05   |
| Site                                | 2            | 923.25  | 5.20    | <0.05   | 2            | 96.40   | 0.25    | 0.78    |
| Interaction                         | 2            | 141.09  | 0.80    | 0.47    | 2            | 339.10  | 0.88    | 0.43    |
| Residuals                           | 18           | 1596.70 |         |         | 21           | 4067.60 |         |         |
| Basidiomycota                       |              |         |         |         |              |         |         |         |
| Invasion                            | 1            | 28.11   | 0.44    | 0.52    | 1            | 271.72  | 1.91    | 0.18    |
| Site                                | 2            | 397.68  | 3.11    | 0.07    | 2            | 235.97  | 0.83    | 0.45    |
| Interaction                         | 2            | 2.06    | 0.02    | 0.98    | 2            | 310.67  | 1.09    | 0.35    |
| Residuals                           | 18           | 1151.77 |         |         | 21           | 2987.87 |         |         |
| Chytridiomycota                     |              |         |         |         |              |         |         |         |
| Invasion                            | 1            | 0.10    | 0.06    | 0.80    | 1            | 0.01    | 0.04    | 0.85    |
| Site                                | 2            | 23.31   | 7.73    | <0.01   | 2            | 0.88    | 2.68    | 0.09    |
| Interaction                         | 2            | 0.40    | 0.13    | 0.88    | 2            | 1.00    | 3.04    | 0.07    |
| Residuals                           | 18           | 27.14   |         |         | 21           | 3.44    |         |         |
| Mortierellomycota                   |              |         |         |         |              |         |         |         |
| Invasion                            | 1            | 20.03   | 2.48    | 0.13    | 1            | 0.39    | 1.18    | 0.29    |
| Site                                | 2            | 123.81  | 7.68    | <0.01   | 2            | 0.02    | 0.04    | 0.96    |

|                          |    |         |       |        |    |        |       |        |
|--------------------------|----|---------|-------|--------|----|--------|-------|--------|
| Interaction              | 2  | 33.42   | 2.07  | 0.15   | 2  | 0.01   | 0.02  | 0.98   |
| Residuals                | 18 | 145.13  |       |        | 21 | 6.93   |       |        |
| <b>Mucoromycota</b>      |    |         |       |        |    |        |       |        |
| Invasion                 | 1  | 0.25    | 1.46  | 0.24   | 1  | 0.29   | 1.46  | 0.24   |
| Site                     | 2  | 1.36    | 3.99  | <0.05  | 2  | 3.91   | 9.98  | <0.001 |
| Interaction              | 2  | 0.10    | 0.30  | 0.74   | 2  | 1.03   | 2.62  | 0.10   |
| Residuals                | 18 | 3.08    |       |        | 21 | 4.11   |       |        |
| <b>Species richness</b>  |    |         |       |        |    |        |       |        |
| <b>All fungi</b>         |    |         |       |        |    |        |       |        |
| Invasion                 | 1  | 648     | 0.62  | 0.44   | 1  | <0.01  | 10.97 | <0.01  |
| Site                     | 2  | 2218    | 1.06  | 0.37   | 2  | <0.01  | 4.17  | <0.05  |
| Interaction              | 2  | 1990    | 0.95  | 0.41   | 2  | <0.01  | 1.14  | 0.34   |
| Residuals                | 15 | 15653   |       |        | 17 | <0.01  |       |        |
| <b>Ectomycorrhizae</b>   |    |         |       |        |    |        |       |        |
| Invasion                 | 1  | 44.56   | 2.61  | 0.13   | 1  | 95.09  | 9.12  | <0.01  |
| Site                     | 2  | 1022.85 | 29.94 | <0.001 | 2  | 10.68  | 0.51  | 0.61   |
| Interaction              | 2  | 39.02   | 1.14  | 0.35   | 2  | 52.35  | 2.51  | 0.11   |
| Residuals                | 15 | 256.20  |       |        | 17 |        |       |        |
| <b>Pathogens</b>         |    |         |       |        |    |        |       |        |
| Invasion                 | 1  | 2.50    | 0.39  | 0.54   | 1  | 0.85   | 3.49  | 0.08   |
| Site                     | 2  | 80.84   | 6.38  | <0.01  | 2  | 1.66   | 3.39  | 0.06   |
| Interaction              | 2  | 25.34   | 2.00  | 0.17   | 2  | 0.45   | 0.93  | 0.41   |
| Residuals                | 15 | 94.97   |       |        | 17 | 4.16   |       |        |
| <b>Saprotrophs</b>       |    |         |       |        |    |        |       |        |
| Invasion                 | 1  | 22.86   | 0.39  | 0.54   | 1  | 0.01   | 9.02  | <0.01  |
| Site                     | 2  | 994.86  | 8.54  | <0.01  | 2  | 0.01   | 6.53  | <0.01  |
| Interaction              | 2  | 66.13   | 0.57  | 0.58   | 2  | <0.01  | 0.95  | 0.40   |
| Residuals                | 15 | 873.87  |       |        | 17 | 0.01   |       |        |
| <b>Species diversity</b> |    |         |       |        |    |        |       |        |
| <b>All fungi</b>         |    |         |       |        |    |        |       |        |
| Invasion                 | 1  | 89      | 0.74  | 0.40   | 1  | <0.01  | 1.44  | 0.25   |
| Site                     | 2  | 1515    | 6.33  | <0.05  | 2  | 0.01   | 7.27  | <0.01  |
| Interaction              | 2  | 103     | 0.43  | 0.66   | 2  | <0.01  | 0.40  | 0.68   |
| Residuals                | 15 | 1796    |       |        | 17 | 0.02   |       |        |
| <b>Ectomycorrhizae</b>   |    |         |       |        |    |        |       |        |
| Invasion                 | 1  | 1.59    | 0.41  | 0.53   | 1  | 5.50   | 1.08  | 0.31   |
| Site                     | 2  | 121.38  | 15.44 | <0.001 | 2  | 2.97   | 0.29  | 0.75   |
| Interaction              | 2  | 0.75    | 0.10  | 0.91   | 2  | 13.32  | 1.30  | 0.30   |
| Residuals                | 15 | 58.97   |       |        | 17 | 86.97  |       |        |
| <b>Pathogens</b>         |    |         |       |        |    |        |       |        |
| Invasion                 | 1  | 0.36    | 0.20  | 0.66   | 1  | 0.41   | 11.89 | <0.01  |
| Site                     | 2  | 32.62   | 9.11  | <0.01  | 2  | 0.06   | 0.92  | 0.42   |
| Interaction              | 2  | 2.54    | 0.71  | 0.51   | 2  | 0.03   | 0.49  | 0.62   |
| Residuals                | 15 | 26.86   |       |        | 17 | 0.58   |       |        |
| <b>Saprotrophs</b>       |    |         |       |        |    |        |       |        |
| Invasion                 | 1  | 4.86    | 0.26  | 0.62   | 1  | 93.72  | 11.22 | <0.01  |
| Site                     | 2  | 456.68  | 12.24 | <0.001 | 2  | 81.63  | 4.88  | <0.05  |
| Interaction              | 2  | 22.16   | 0.59  | 0.56   | 2  | 22.56  | 1.35  | 0.29   |
| Residuals                | 15 | 279.72  |       |        | 17 | 142.04 |       |        |

Table S4. Two-way analyses of variance (ANOVA; factors: earthworm invasion and site) of relative abundance (as number of reads) of bacterial phyla and family levels, and global diversity indices, for forest floors and mineral soils separately. At the family-level, taxa present in >60% of the samples and representing >0.5% of average relative abundance were selected for ANOVA and only families significantly affected by earthworm invasion in forest floors and/or mineral soils are displayed. Missing groups for either the forest floor or the mineral soil correspond to those that did not meet the selection criteria. Df stands for degrees of freedom and Sum sq for sum of squares.

|                         | FOREST FLOOR |        |         |         | MINERAL SOIL |        |         |         |
|-------------------------|--------------|--------|---------|---------|--------------|--------|---------|---------|
|                         | Df           | Sum Sq | F value | p-value | Df           | Sum Sq | F value | p-value |
| <b>Bacterial phyla</b>  |              |        |         |         |              |        |         |         |
| <b>Actinobacteriota</b> |              |        |         |         |              |        |         |         |
| Invasion                | 1            | 0.02   | 3.19    | 0.09    | 1            | 0.00   | 0.00    | 1.00    |
| Site                    | 2            | 0.03   | 2.41    | 0.12    | 2            | 0.05   | 17.57   | <0.001  |
| Interaction             | 2            | 0.01   | 0.82    | 0.46    | 2            | 0.00   | 0.23    | 0.79    |
| Residuals               | 18           | 0.10   |         |         | 21           | 0.03   |         |         |
| <b>Acidobacteriota</b>  |              |        |         |         |              |        |         |         |
| Invasion                | 1            | 0.00   | 0.00    | 0.98    | 1            | 0.01   | 3.24    | 0.09    |
| Site                    | 2            | 0.01   | 1.78    | 0.20    | 2            | 0.01   | 2.10    | 0.15    |
| Interaction             | 2            | 0.01   | 1.59    | 0.23    | 2            | 0.00   | 0.35    | 0.71    |
| Residuals               | 18           | 0.03   |         |         | 21           | 0.05   |         |         |
| <b>Bacteroidota</b>     |              |        |         |         |              |        |         |         |
| Invasion                | 1            | 0.00   | 0.91    | 0.35    | 1            | 1.26   | 9.37    | <0.01   |
| Site                    | 2            | 0.03   | 11.68   | <0.001  | 2            | 2.15   | 7.99    | <0.01   |
| Interaction             | 2            | 0.00   | 0.06    | 0.94    | 2            | 0.34   | 1.26    | 0.30    |
| Residuals               | 18           | 0.02   |         |         | 21           | 2.82   |         |         |
| <b>Chloroflexi</b>      |              |        |         |         |              |        |         |         |
| Invasion                | 1            | 0.00   | 0.22    | 0.64    | 1            | 0.00   | 3.54    | 0.07    |
| Site                    | 2            | 0.00   | 9.70    | <0.01   | 2            | 0.02   | 15.42   | <0.001  |
| Interaction             | 2            | 0.00   | 1.04    | 0.37    | 2            | 0.00   | 1.61    | 0.22    |
| Residuals               | 18           | 0.00   |         |         | 21           | 0.01   |         |         |
| <b>Firmicutes</b>       |              |        |         |         |              |        |         |         |
| Invasion                | 1            | 0.07   | 0.03    | 0.86    | 1            | 0.00   | 0.81    | 0.38    |
| Site                    | 2            | 2.95   | 0.74    | 0.49    | 2            | 0.00   | 0.04    | 0.96    |
| Interaction             | 2            | 3.78   | 0.95    | 0.41    | 2            | 0.00   | 2.98    | 0.07    |
| Residuals               | 18           | 35.92  |         |         | 21           | 0.01   |         |         |
| <b>Gemmatimonadota</b>  |              |        |         |         |              |        |         |         |
| Invasion                | 1            | 0.00   | 0.08    | 0.78    | 1            | 0.00   | 2.66    | 0.12    |
| Site                    | 2            | 0.00   | 66.61   | <0.001  | 2            | 0.00   | 15.62   | <0.001  |
| Interaction             | 2            | 0.00   | 0.10    | 0.91    | 2            | 0.00   | 0.52    | 0.60    |
| Residuals               | 18           | 0.00   |         |         | 21           | 0.00   |         |         |
| <b>Planctomycetota</b>  |              |        |         |         |              |        |         |         |
| Invasion                | 1            | 0.00   | 0.13    | 0.72    | 1            | 0.00   | 0.38    | 0.55    |
| Site                    | 2            | 0.00   | 0.04    | 0.96    | 2            | 0.02   | 7.91    | <0.01   |
| Interaction             | 2            | 0.00   | 0.09    | 0.92    | 2            | 0.00   | 0.90    | 0.42    |

|                                       |    |        |       |        |    |        |       |        |
|---------------------------------------|----|--------|-------|--------|----|--------|-------|--------|
| Residuals                             | 18 | 0.09   |       |        | 21 | 0.02   |       |        |
| <b>Proteobacteria</b>                 |    |        |       |        |    |        |       |        |
| Invasion                              | 1  | 0.00   | 0.81  | 0.38   | 1  | 0.00   | 6.81  | <0.05  |
| Site                                  | 2  | 0.03   | 3.53  | 0.05   | 2  | 0.01   | 14.40 | <0.001 |
| Interaction                           | 2  | 0.00   | 0.36  | 0.70   | 2  | 0.01   | 7.74  | <0.01  |
| Residuals                             | 18 | 0.08   |       |        | 21 | 0.01   |       |        |
| <b>Alphaproteobacteria</b>            |    |        |       |        |    |        |       |        |
| Invasion                              | 1  | 0.02   | 0.62  | 0.44   | 1  | 0.83   | 1.49  | 0.24   |
| Site                                  | 2  | 0.19   | 3.00  | 0.07   | 2  | 24.21  | 21.71 | <0.001 |
| Interaction                           | 2  | 0.04   | 0.59  | 0.57   | 2  | 6.34   | 5.69  | <0.05  |
| Residuals                             | 18 | 0.57   |       |        | 21 | 11.71  |       |        |
| <b>Gammaproteobacteria</b>            |    |        |       |        |    |        |       |        |
| Invasion                              | 1  | 0.01   | 0.23  | 0.64   | 1  | 0.00   | 5.28  | <0.05  |
| Site                                  | 2  | 0.09   | 1.76  | 0.20   | 2  | 0.03   | 15.86 | <0.001 |
| Interaction                           | 2  | 0.01   | 0.30  | 0.75   | 2  | 0.00   | 0.18  | 0.83   |
| Residuals                             | 18 | 0.44   |       |        | 21 | 0.02   |       |        |
| <b>Verrucomicrobiota</b>              |    |        |       |        |    |        |       |        |
| Invasion                              | 1  | 0.00   | 6.43  | <0.05  | 1  | 0.00   | 0.74  | 0.40   |
| Site                                  | 2  | 0.00   | 31.96 | <0.001 | 2  | 0.01   | 7.48  | <0.01  |
| Interaction                           | 2  | 0.00   | 0.92  | 0.42   | 2  | 0.00   | 0.14  | 0.87   |
| Residuals                             | 18 | 0.00   |       |        | 21 | 0.01   |       |        |
| <b>Proteobacteria:Acidobacteriota</b> |    |        |       |        |    |        |       |        |
| Invasion                              | 1  | 0.44   | 0.38  | 0.55   | 1  | 0.18   | 7.66  | <0.05  |
| Site                                  | 2  | 3.30   | 1.43  | 0.26   | 2  | 0.06   | 1.25  | 0.31   |
| Interaction                           | 2  | 2.32   | 1.00  | 0.39   | 2  | 0.02   | 0.40  | 0.67   |
| Residuals                             | 18 | 20.76  |       |        | 21 | 0.49   |       |        |
| <b>Bacterial families</b>             |    |        |       |        |    |        |       |        |
| <b>Acidothermaceae</b>                |    |        |       |        |    |        |       |        |
| Invasion                              | 1  | 0.04   | 1.38  | 0.26   | 1  | 1.83   | 3.45  | 0.08   |
| Site                                  | 2  | 0.96   | 18.55 | <0.001 | 2  | 2.76   | 2.61  | <0.1   |
| Interaction                           | 2  | 0.05   | 0.93  | 0.41   | 2  | 1.62   | 1.53  | 0.24   |
| Residuals                             | 18 | 0.47   |       |        | 21 | 11.11  |       |        |
| <b>Chitinophagaceae</b>               |    |        |       |        |    |        |       |        |
| Invasion                              | 1  | 12.03  | 3.17  | 0.09   | 1  | 0.03   | 5.34  | <0.05  |
| Site                                  | 2  | 155.33 | 20.48 | <0.001 | 2  | 0.10   | 8.10  | <0.01  |
| Interaction                           | 2  | 4.30   | 0.57  | 0.58   | 2  | 0.01   | 0.60  | 0.56   |
| Residuals                             | 18 | 68.28  |       |        | 21 | 0.13   |       |        |
| <b>Chthoniobacteraceae</b>            |    |        |       |        |    |        |       |        |
| Invasion                              | 1  | 0.12   | 11.12 | <0.01  | 1  | 7.92   | 2.44  | 0.13   |
| Site                                  | 2  | 0.96   | 44.07 | <0.001 | 2  | 179.94 | 27.75 | <0.001 |
| Interaction                           | 2  | 0.03   | 1.21  | 0.32   | 2  | 10.46  | 1.61  | 0.22   |
| Residuals                             | 18 | 0.20   |       |        | 21 | 68.09  |       |        |
| <b>Gemmatimonadaceae</b>              |    |        |       |        |    |        |       |        |
| Invasion                              |    |        |       |        | 1  | 0.12   | 7.36  | <0.05  |
| Site                                  |    |        |       |        | 2  | 0.75   | 23.39 | <0.001 |
| Interaction                           |    |        |       |        | 2  | 0.09   | 2.85  | 0.08   |
| Residuals                             |    |        |       |        | 21 | 0.34   |       |        |
| <b>Nitrosomonadaceae</b>              |    |        |       |        |    |        |       |        |
| Invasion                              |    |        |       |        | 1  | 0.47   | 5.97  | <0.05  |

|                               |    |        |       |        |    |       |       |        |
|-------------------------------|----|--------|-------|--------|----|-------|-------|--------|
| Site                          |    |        |       |        | 2  | 0.43  | 2.70  | 0.09   |
| Interaction                   |    |        |       |        | 2  | 0.26  | 1.67  | 0.21   |
| Residuals                     |    |        |       |        | 21 | 1.66  |       |        |
| <b>Pirellulaceae</b>          |    |        |       |        |    |       |       |        |
| Invasion                      | 1  | 0.00   | 0.00  | 0.96   | 1  | 17.28 | 14.50 | <0.01  |
| Site                          | 2  | 100.22 | 26.77 | <0.001 | 2  | 4.80  | 2.01  | 0.16   |
| Interaction                   | 2  | 1.76   | 0.47  | 0.63   | 2  | 6.47  | 1.46  | 0.26   |
| Residuals                     | 18 | 33.70  |       |        | 21 | 25.03 |       |        |
| <b>Reyranellaceae</b>         |    |        |       |        |    |       |       |        |
| Invasion                      | 1  | 0.29   | 3.10  | <0.1   | 1  | 0.60  | 8.26  | <0.01  |
| Site                          | 2  | 2.42   | 12.84 | <0.001 | 2  | 0.52  | 3.64  | <0.05  |
| Interaction                   | 2  | 0.02   | 0.12  | 0.89   | 2  | 0.18  | 1.23  | 0.31   |
| Residuals                     | 18 | 1.70   |       |        | 21 | 1.51  |       |        |
| <b>Solibacteraceae</b>        |    |        |       |        |    |       |       |        |
| Invasion                      |    |        |       |        | 1  | 0.53  | 3.30  | 0.08   |
| Site                          |    |        |       |        | 2  | 1.28  | 3.95  | <0.05  |
| Interaction                   |    |        |       |        | 2  | 0.27  | 0.83  | 0.45   |
| Residuals                     |    |        |       |        | 21 | 3.40  |       |        |
| <b>Solirubrobacteraceae</b>   |    |        |       |        |    |       |       |        |
| Invasion                      | 1  | 0.92   | 7.23  | <0.05  | 1  | 0.09  | 0.10  | 0.76   |
| Site                          | 2  | 1.88   | 7.40  | <0.01  | 2  | 0.83  | 0.46  | 0.64   |
| Interaction                   | 2  | 0.21   | 0.84  | 0.45   | 2  | 6.48  | 3.57  | <0.05  |
| Residuals                     | 18 | 2.28   |       |        | 21 | 19.07 |       |        |
| <b>Thermoanaerobaculaceae</b> |    |        |       |        |    |       |       |        |
| Invasion                      |    |        |       |        | 1  | 0.71  | 5.19  | <0.05  |
| Site                          |    |        |       |        | 2  | 0.43  | 1.57  | 0.23   |
| Interaction                   |    |        |       |        | 2  | 1.63  | 5.96  | <0.01  |
| Residuals                     |    |        |       |        | 21 | 2.87  |       |        |
| <b>Xiphinematobacteraceae</b> |    |        |       |        |    |       |       |        |
| Invasion                      |    |        |       |        | 1  | 0.64  | 10.91 | <0.01  |
| Site                          |    |        |       |        | 2  | 1.21  | 10.38 | <0.001 |
| Interaction                   |    |        |       |        | 2  | 0.79  | 6.73  | <0.01  |
| Residuals                     |    |        |       |        | 21 | 1.23  |       |        |
| <b>Species richness</b>       |    |        |       |        |    |       |       |        |
| Invasion                      | 1  | 8875   | 3.37  | 0.08   | 1  | 12004 | 11.74 | <0.01  |
| Site                          | 2  | 114472 | 21.70 | <0.001 | 2  | 6136  | 3.00  | 0.07   |
| Interaction                   | 2  | 187    | 0.04  | 0.97   | 2  | 966   | 0.47  | 0.63   |
| Residuals                     | 18 | 47472  |       |        | 22 | 22487 |       |        |
| <b>Species diversity</b>      |    |        |       |        |    |       |       |        |
| Invasion                      | 1  | 1041   | 1.65  | 0.22   | 1  | 1758  | 6.57  | <0.05  |
| Site                          | 2  | 45005  | 35.67 | <0.001 | 2  | 219   | 0.41  | 0.67   |
| Interaction                   | 2  | 64     | 0.05  | 0.95   | 2  | 106   | 0.20  | 0.82   |
| Residuals                     | 18 | 11354  |       |        | 21 | 5887  |       |        |



Table S5. Two-way analyses of variance (factors: earthworm invasion and site) for phospholipid fatty acid (PLFA) concentration of individual PLFAs as well as groups (total, Gram(+) and Gram(-) bacteria, and fungi) and microbial ratios, for forest floors and mineral soils separately. The 10Me ratio was obtained by dividing the phospholipid fatty acid (PLFA) 10Me16:0 by 16:0 and the Cyclo ratio by dividing the sum of cy19:0 $\omega$ 9 and cy19:0 $\omega$ 7 divided by 18:0. The Proteobacteria:Acidobacteriota (Proteo:Acido) ratio was calculated from the number of reads corresponding to the two phyla. Df stands for degrees of freedom and Sum sq for sum of squares.

|                           | FOREST FLOOR |          |         |         | MINERAL SOIL |        |         |         |
|---------------------------|--------------|----------|---------|---------|--------------|--------|---------|---------|
|                           | Df           | Sum Sq   | F value | p-value | Df           | Sum Sq | F value | p-value |
| <b>Total PLFA biomass</b> |              |          |         |         |              |        |         |         |
| Invasion                  | 1            | 3999847  | 2.63    | 0.12    | 1            | 0.00   | 1.64    | 0.21    |
| Site                      | 2            | 2415436  | 0.79    | 0.47    | 2            | 0.00   | 3.13    | <0.1    |
| Interaction               | 2            | 5020883  | 1.65    | 0.22    | 2            | 0.00   | 1.01    | 0.38    |
| Residuals                 | 18           | 27357255 |         |         | 22           | 0.00   |         |         |
| <b>PLFA 15:0</b>          |              |          |         |         |              |        |         |         |
| Invasion                  | 1            | 0.00     | 2.36    | 0.14    | 1            | 0.01   | 2.60    | 0.12    |
| Site                      | 2            | 0.00     | 13.98   | <0.001  | 2            | 0.02   | 2.87    | 0.08    |
| Interaction               | 2            | 0.00     | 1.76    | 0.20    | 2            | 0.01   | 1.68    | 0.21    |
| Residuals                 | 18           | 0.00     |         |         | 22           | 0.07   |         |         |
| <b>Gram(+) bacteria</b>   |              |          |         |         |              |        |         |         |
| Invasion                  | 1            | 0.00     | 1.13    | 0.30    | 1            | 0.00   | 0.44    | 0.51    |
| Site                      | 2            | 0.01     | 2.59    | 0.10    | 2            | 0.00   | 3.74    | <0.05   |
| Interaction               | 2            | 0.00     | 0.47    | 0.63    | 2            | 0.00   | 0.92    | 0.41    |
| Residuals                 | 18           | 0.03     |         |         | 22           | 0.01   |         |         |
| <b>PLFA i14:0</b>         |              |          |         |         |              |        |         |         |
| Invasion                  | 1            | 8.21     | 4.54    | <0.05   | 1            | 0.03   | 2.34    | 0.14    |
| Site                      | 2            | 52.10    | 14.41   | <0.001  | 2            | 0.02   | 0.76    | 0.48    |
| Interaction               | 2            | 3.41     | 0.94    | 0.41    | 2            | 0.02   | 0.84    | 0.44    |
| Residuals                 | 18           | 32.55    |         |         | 22           | 0.25   |         |         |
| <b>PLFA i15:0</b>         |              |          |         |         |              |        |         |         |
| Invasion                  | 1            | 0.00     | 0.18    | 0.68    | 1            | 0.00   | 0.21    | 0.65    |
| Site                      | 2            | 0.00     | 5.34    | <0.05   | 2            | 0.01   | 4.01    | <0.05   |
| Interaction               | 2            | 0.00     | 0.23    | 0.79    | 2            | 0.00   | 0.64    | 0.54    |
| Residuals                 | 18           | 0.01     |         |         | 22           | 0.04   |         |         |
| <b>PLFA a15:0</b>         |              |          |         |         |              |        |         |         |
| Invasion                  | 1            | 0.52     | 2.38    | 0.14    | 1            | 0.00   | 0.94    | 0.34    |
| Site                      | 2            | 0.80     | 1.83    | 0.19    | 2            | 0.00   | 2.40    | 0.11    |
| Interaction               | 2            | 0.22     | 0.51    | 0.61    | 2            | 0.00   | 1.04    | 0.37    |
| Residuals                 | 18           | 3.94     |         |         | 22           | 0.01   |         |         |
| <b>PLFA i16:0</b>         |              |          |         |         |              |        |         |         |
| Invasion                  | 1            | 0.65     | 1.25    | 0.28    | 1            | 0.00   | 0.01    | 0.95    |
| Site                      | 2            | 2.14     | 2.08    | 0.15    | 2            | 0.05   | 6.21    | <0.01   |
| Interaction               | 2            | 1.25     | 1.21    | 0.32    | 2            | 0.00   | 0.24    | 0.79    |
| Residuals                 | 18           | 9.26     |         |         | 22           | 0.09   |         |         |

|                                      |    |            |       |       |    |       |       |        |
|--------------------------------------|----|------------|-------|-------|----|-------|-------|--------|
| <b>PLFA a16:0</b>                    |    |            |       |       |    |       |       |        |
| Invasion                             | 1  | 18.22      | 0.44  | 0.52  | 1  | 1.41  | 1.74  | 0.20   |
| Site                                 | 2  | 139.10     | 1.66  | 0.22  | 2  | 0.13  | 0.08  | 0.92   |
| Interaction                          | 2  | 77.73      | 0.93  | 0.41  | 2  | 1.54  | 0.95  | 0.40   |
| Residuals                            | 18 | 753.25     |       |       | 22 | 17.81 |       |        |
| <b>PLFA i17:0</b>                    |    |            |       |       |    |       |       |        |
| Invasion                             | 1  | 1.32       | 0.42  | 0.53  | 1  | 0.00  | 0.28  | 0.60   |
| Site                                 | 2  | 4.65       | 0.74  | 0.49  | 2  | 0.03  | 5.07  | <0.05  |
| Interaction                          | 2  | 2.22       | 0.35  | 0.71  | 2  | 0.00  | 0.47  | 0.63   |
| Residuals                            | 18 | 56.69      |       |       | 22 | 0.06  |       |        |
| <b>PLFA a17:0</b>                    |    |            |       |       |    |       |       |        |
| Invasion                             | 1  | 0.00       | 4.61  | <0.05 | 1  | 0.01  | 2.36  | 0.14   |
| Site                                 | 2  | 0.02       | 10.36 | <0.01 | 2  | 0.01  | 1.66  | 0.21   |
| Interaction                          | 2  | 0.00       | 1.43  | 0.26  | 2  | 0.01  | 1.21  | 0.32   |
| Residuals                            | 18 | 0.01       |       |       | 22 | 0.10  |       |        |
| <b>Gram(-) bacteria</b>              |    |            |       |       |    |       |       |        |
| Invasion                             | 1  | 14999      | 0.52  | 0.48  | 1  | 0.00  | 1.28  | 0.27   |
| Site                                 | 2  | 24504      | 0.42  | 0.66  | 2  | 0.00  | 3.28  | 0.06   |
| Interaction                          | 2  | 27389      | 0.47  | 0.63  | 2  | 0.00  | 0.81  | 0.46   |
| Residuals                            | 18 | 521854     |       |       | 22 | 0.01  |       |        |
| <b>PLFA 16:1<math>\omega</math>7</b> |    |            |       |       |    |       |       |        |
| Invasion                             | 1  | 0.00       | 1.71  | 0.21  | 1  | 0.00  | 2.82  | 0.11   |
| Site                                 | 2  | 0.00       | 2.05  | 0.16  | 2  | 0.00  | 1.95  | 0.16   |
| Interaction                          | 2  | 0.00       | 0.48  | 0.63  | 2  | 0.00  | 0.98  | 0.39   |
| Residuals                            | 18 | 0.00       |       |       | 22 | 0.01  |       |        |
| <b>PLFA 18:1<math>\omega</math>7</b> |    |            |       |       |    |       |       |        |
| Invasion                             | 1  | 63133      | 0.24  | 0.63  | 1  | 0.00  | 1.52  | 0.23   |
| Site                                 | 2  | 1458794    | 2.76  | 0.09  | 2  | 0.01  | 3.73  | <0.05  |
| Interaction                          | 2  | 70452      | 0.13  | 0.88  | 2  | 0.00  | 0.75  | 0.49   |
| Residuals                            | 18 | 4757624    |       |       | 22 | 0.02  |       |        |
| <b>PLFA cy17:0</b>                   |    |            |       |       |    |       |       |        |
| Invasion                             | 1  | 0.00       | 0.70  | 0.41  | 1  | 0.01  | 2.76  | 0.11   |
| Site                                 | 2  | 0.00       | 2.15  | 0.15  | 2  | 0.01  | 1.53  | 0.24   |
| Interaction                          | 2  | 0.00       | 1.32  | 0.29  | 2  | 0.01  | 2.08  | 0.15   |
| Residuals                            | 18 | 0.00       |       |       | 22 | 0.08  |       |        |
| <b>PLFA cy19:0</b>                   |    |            |       |       |    |       |       |        |
| Invasion                             | 1  | 5893459    | 0.02  | 0.88  | 1  | 2.59  | 2.54  | 0.13   |
| Site                                 | 2  | 353813238  | 0.69  | 0.51  | 2  | 4.35  | 2.13  | 0.14   |
| Interaction                          | 2  | 166864618  | 0.33  | 0.73  | 2  | 0.99  | 0.49  | 0.62   |
| Residuals                            | 18 | 4602455820 |       |       | 22 | 22.42 |       |        |
| <b>PLFA 18:2<math>\omega</math>6</b> |    |            |       |       |    |       |       |        |
| Invasion                             | 1  | 56373      | 0.56  | 0.46  | 1  | 0.01  | 8.27  | <0.01  |
| Site                                 | 2  | 20356      | 0.10  | 0.90  | 2  | 0.02  | 12.34 | <0.001 |
| Interaction                          | 2  | 218745     | 1.09  | 0.36  | 2  | 0.00  | 0.72  | 0.50   |
| Residuals                            | 18 | 1798436    |       |       | 22 | 0.01  |       |        |
| <b>Eukaryotes</b>                    |    |            |       |       |    |       |       |        |
| Invasion                             | 1  | 0.00       | 2.07  | 0.17  | 1  | 0.20  | 3.94  | 0.06   |
| Site                                 | 2  | 0.00       | 0.84  | 0.45  | 2  | 0.17  | 1.65  | 0.21   |
| Interaction                          | 2  | 0.00       | 1.12  | 0.35  | 2  | 0.02  | 0.23  | 0.79   |

|                        |    |       |       |        |    |       |       |        |
|------------------------|----|-------|-------|--------|----|-------|-------|--------|
| Residuals              | 18 | 0.00  |       |        | 22 | 1.10  |       |        |
| <b>PLFA 20:4ω6</b>     |    |       |       |        |    |       |       |        |
| Invasion               | 1  | 0.00  | 4.83  | <0.05  | 1  | 5.49  | 4.73  | <0.05  |
| Site                   | 2  | 0.00  | 0.34  | 0.72   | 2  | 3.26  | 1.41  | 0.27   |
| Interaction            | 2  | 0.00  | 2.02  | 0.16   | 2  | 1.61  | 0.69  | 0.51   |
| Residuals              | 18 | 0.00  |       |        | 22 | 25.55 |       |        |
| <b>PLFA 20:5ω3</b>     |    |       |       |        |    |       |       |        |
| Invasion               | 1  | 0.01  | 2.17  | 0.16   | 1  | 0.78  | 1.58  | 0.22   |
| Site                   | 2  | 0.07  | 13.66 | <0.001 | 2  | 0.91  | 0.92  | 0.41   |
| Interaction            | 2  | 0.00  | 0.77  | 0.48   | 2  | 1.05  | 1.07  | 0.36   |
| Residuals              | 18 | 0.05  |       |        | 22 | 10.81 |       |        |
| <b>PLFA 20:1ω9</b>     |    |       |       |        |    |       |       |        |
| Invasion               | 1  | 1293  | 0.68  | 0.42   | 1  | 1.47  | 0.43  | 0.51   |
| Site                   | 2  | 18289 | 4.78  | <0.05  | 2  | 13.66 | 2.01  | 0.16   |
| Interaction            | 2  | 10737 | 2.81  | 0.09   | 2  | 3.77  | 0.56  | 0.58   |
| Residuals              | 18 | 34417 |       |        | 22 | 74.73 |       |        |
| <b>Ratios</b>          |    |       |       |        |    |       |       |        |
| <b>Gram(+):Gram(-)</b> |    |       |       |        |    |       |       |        |
| Invasion               | 1  | 0.31  | 1.53  | 0.23   | 1  | 0.06  | 9.29  | <0.01  |
| Site                   | 2  | 2.20  | 5.51  | <0.05  | 2  | 0.02  | 1.47  | 0.25   |
| Interaction            | 2  | 0.16  | 0.41  | 0.67   | 2  | 0.00  | 0.07  | 0.93   |
| Residuals              | 18 | 3.60  |       |        | 22 | 0.14  |       |        |
| <b>Fungi:Bacteria</b>  |    |       |       |        |    |       |       |        |
| Invasion               | 1  | 0.00  | 0.00  | 1.00   | 1  | 0.10  | 3.49  | 0.08   |
| Site                   | 2  | 0.03  | 0.47  | 0.63   | 2  | 1.72  | 29.55 | <0.001 |
| Interaction            | 2  | 0.01  | 0.19  | 0.83   | 2  | 0.05  | 0.78  | 0.47   |
| Residuals              | 18 | 0.55  |       |        | 22 | 0.64  |       |        |
| <b>10Me ratio</b>      |    |       |       |        |    |       |       |        |
| Invasion               | 1  | 0.00  | 0.09  | 0.77   | 1  | 0.14  | 9.05  | <0.01  |
| Site                   | 2  | 0.09  | 2.64  | 0.10   | 2  | 0.26  | 8.78  | <0.01  |
| Interaction            | 2  | 0.01  | 0.38  | 0.69   | 2  | 0.02  | 0.51  |        |
| Residuals              | 18 | 0.29  |       |        | 22 | 0.33  |       |        |
| <b>Cyclo ratio</b>     |    |       |       |        |    |       |       |        |
| Invasion               | 1  | 0.79  | 0.99  | 0.34   | 1  | 0.03  | 8.49  | <0.01  |
| Site                   | 2  | 29.64 | 18.49 | <0.001 | 2  | 0.10  | 13.61 | <0.001 |
| Interaction            | 2  | 0.71  | 0.45  | 0.65   | 2  | 0.00  | 0.36  | 0.70   |
| Residuals              | 18 | 12.82 |       |        | 22 | 0.08  |       |        |

## Supplementary figures

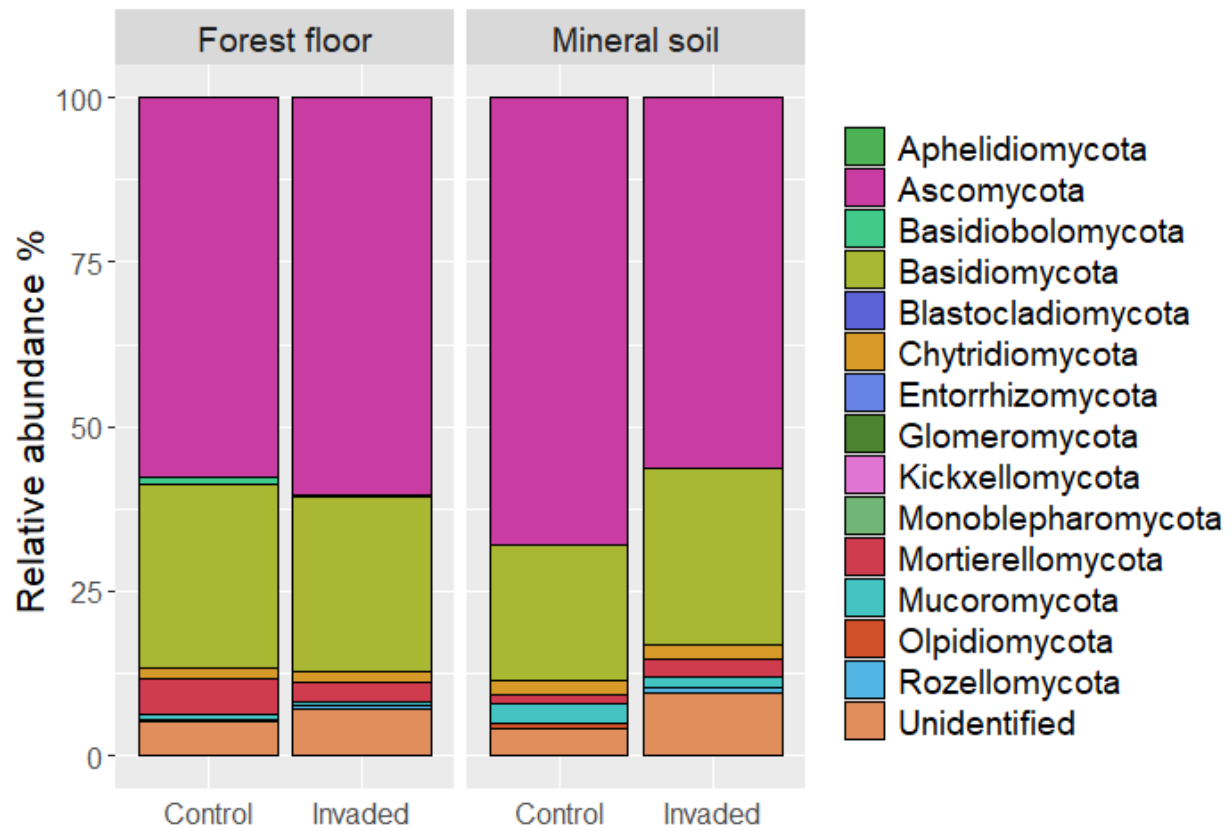

Figure S1. Average relative abundances (as number of reads) of fungal phyla in control and earthworm-invaded forest floors and mineral soils.

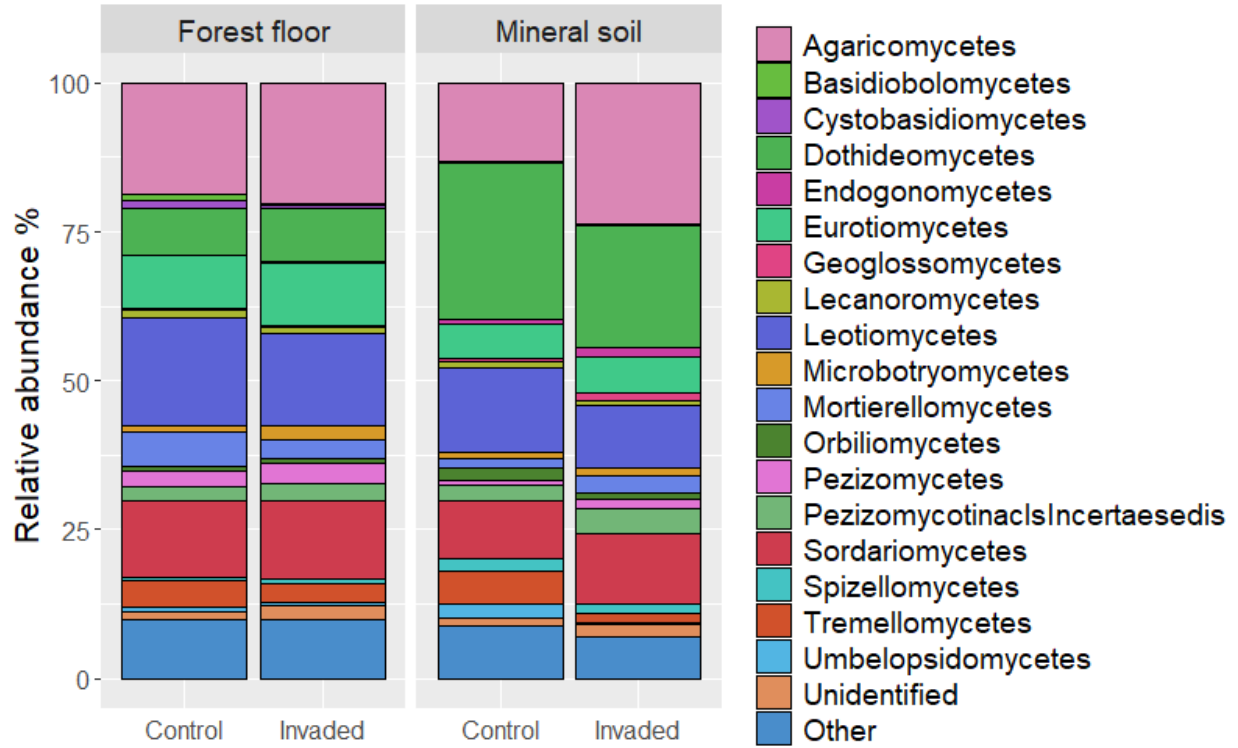

Figure S2. Average relative abundances (as number of reads) of fungal classes representing > 1% of the number of reads in control and earthworm-invaded forest floors and mineral soils.

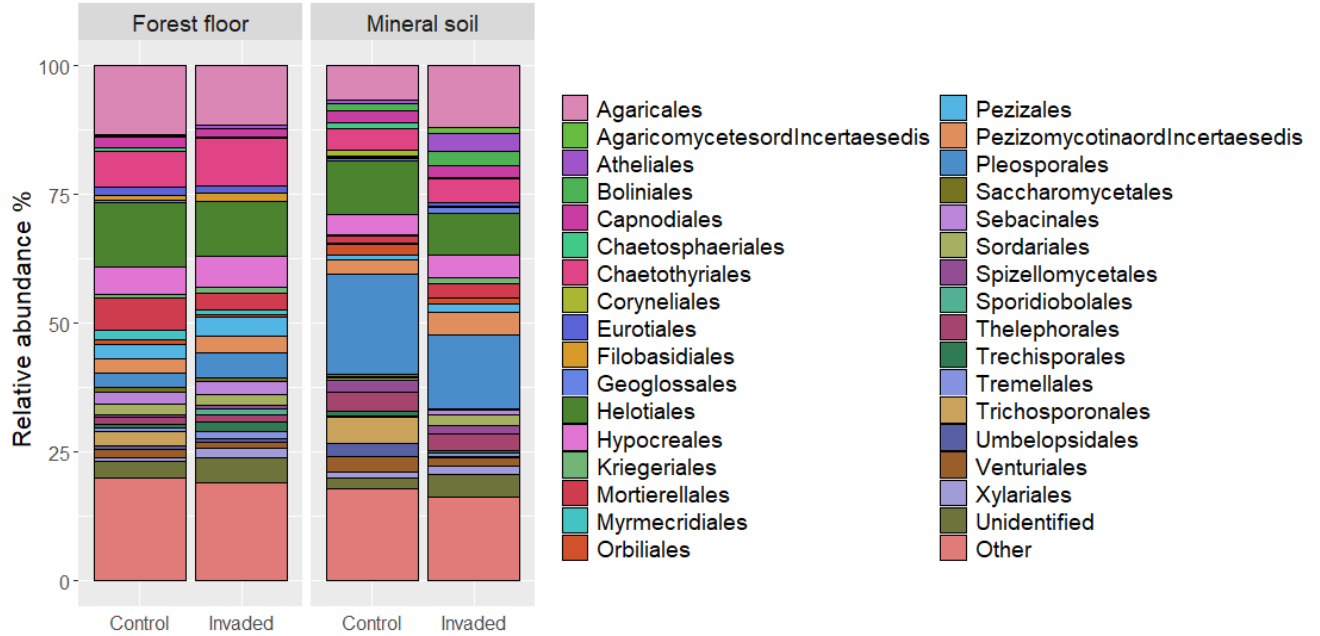

Figure S3. Average relative abundances (as number of reads) of fungal orders representing > 1% of the number of reads in control and earthworm-invaded forest floors and mineral soils.

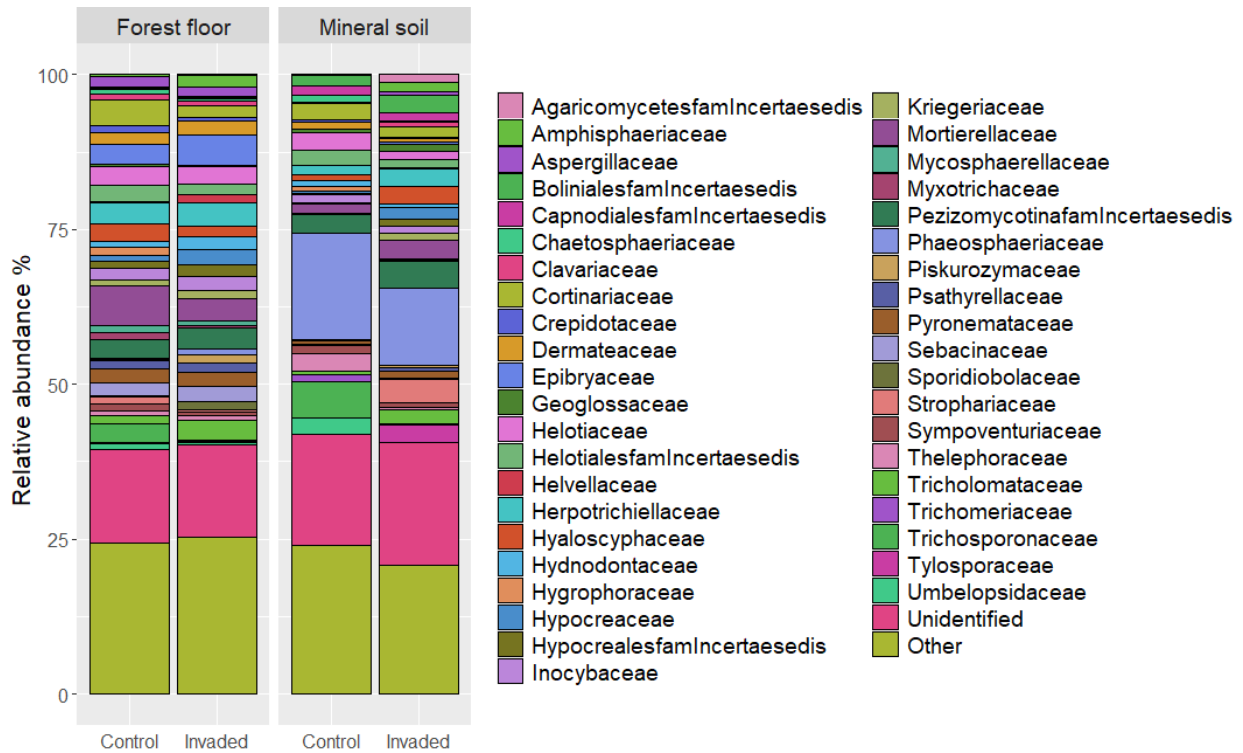

Figure S4. Average relative abundances (as number of reads) of fungal families representing > 1% of the number of reads in control and earthworm-invaded forest floors and mineral soils.

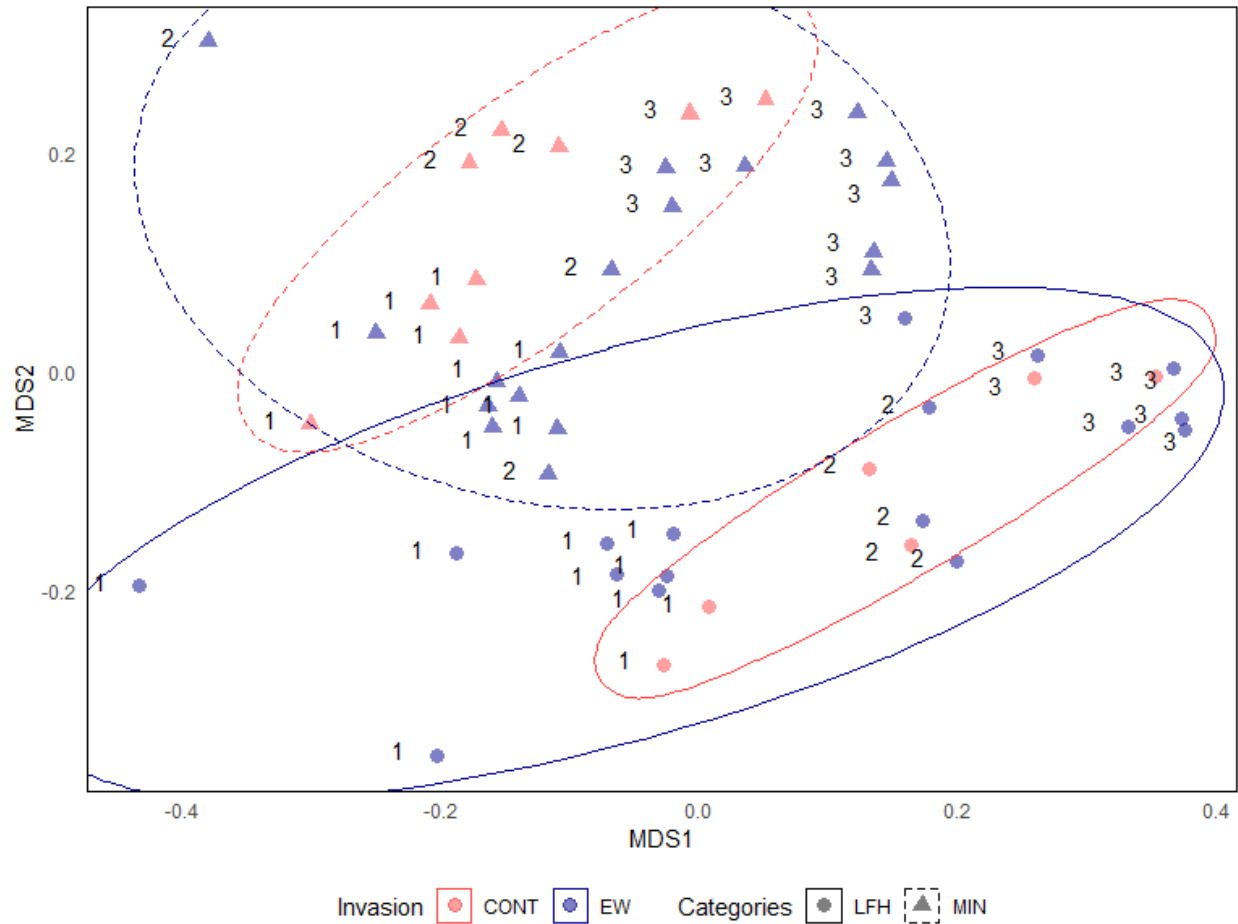

Figure S5. Non-metric multidimensional scaling of fungal amplicon sequence variants (ASVs) using metaMDS function from the vegan package on Bray-Curtis distance matrices after Hellinger transformation of individual ASV abundance (Anderson and Willis, 2003; Legendre and Gallagher, 2001; Oksanen et al., 2019). The final stress was 0.16, non-metric fit  $R^2=0.97$  and linear fit  $R^2=0.87$ . Numbers correspond to sites: EMEND (1), Grands Jardins (2) and Valcartier (3). Earthworm invaded sites denoted by purple circles, non-invaded sites by pink circles; forest floors (LFH) represented by circles and mineral soils (MIN) by triangles.

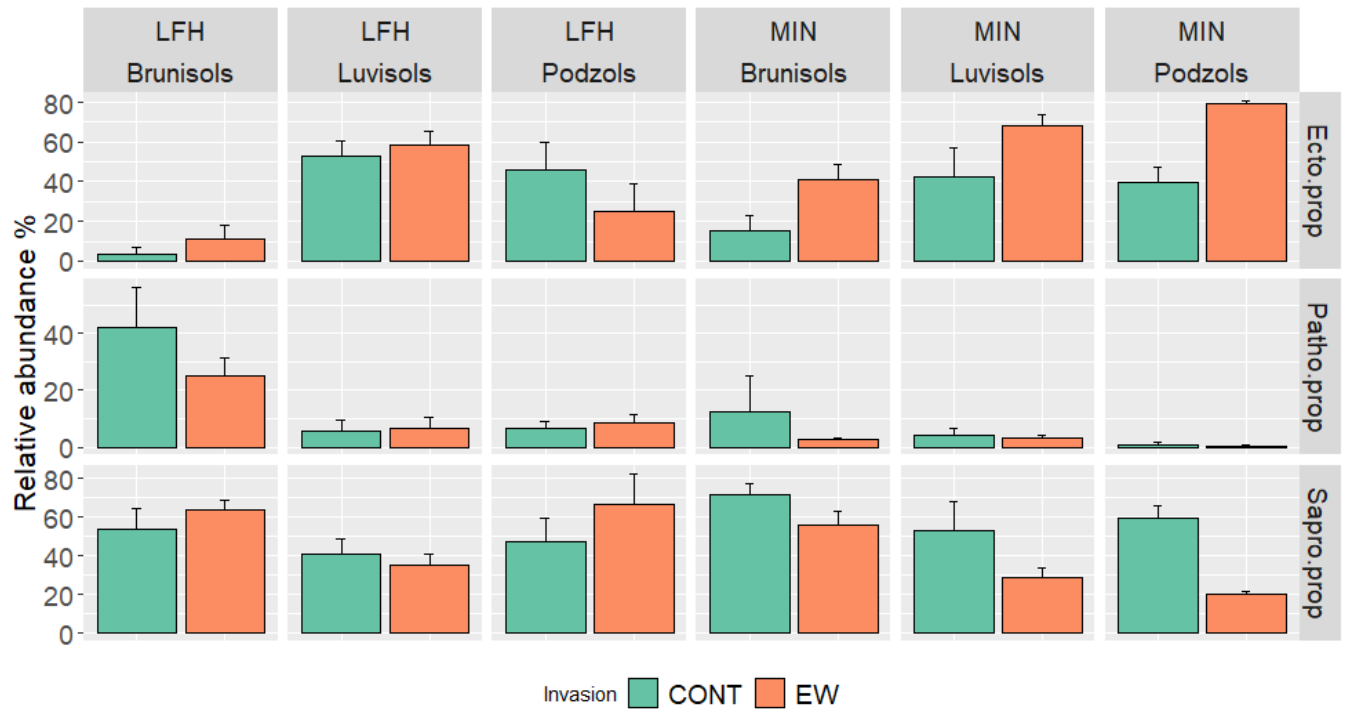

Figure S6. Average ( $\pm 1$  SE) relative abundances (as number of reads) of fungal guilds for each individual site.



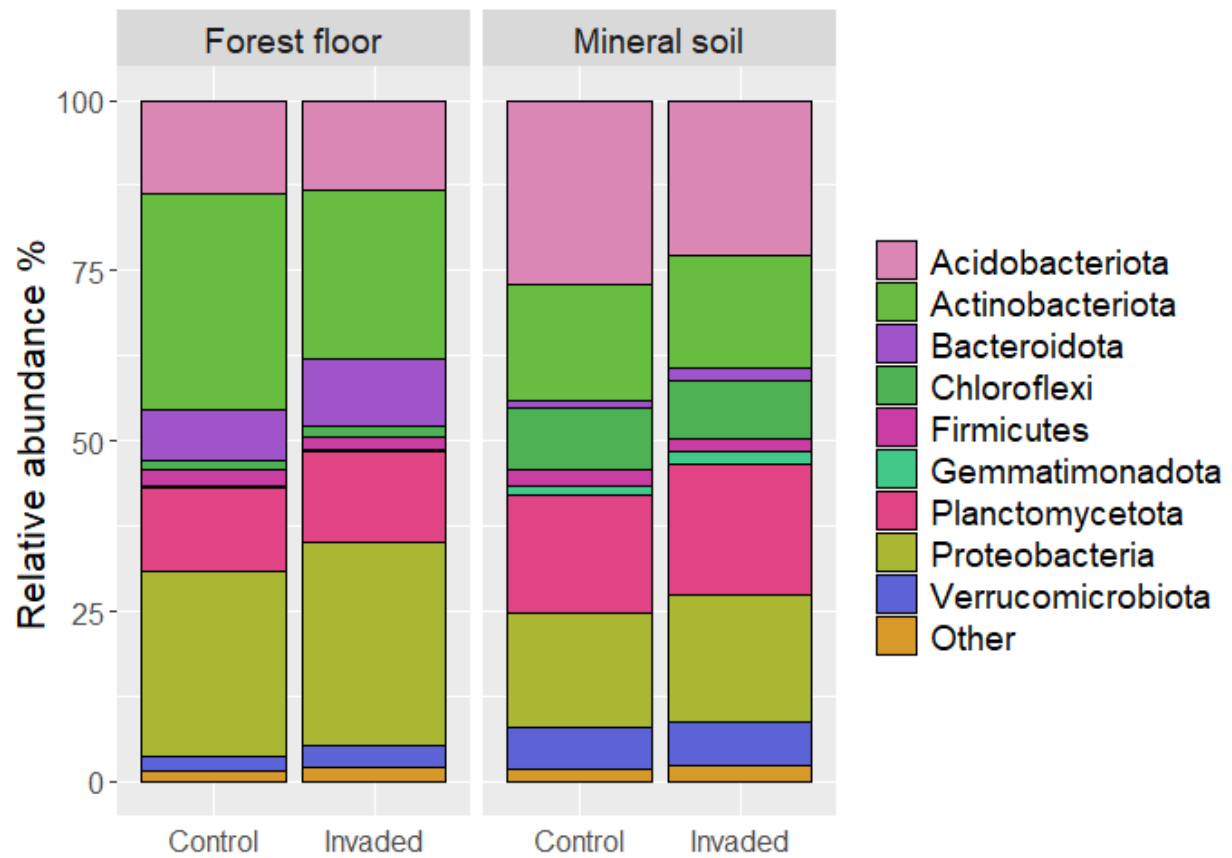

Figure S7. Average relative abundances (as number of reads) of bacterial phyla representing > 1% of the number of reads in control and earthworm-invaded forest floors and mineral soils.

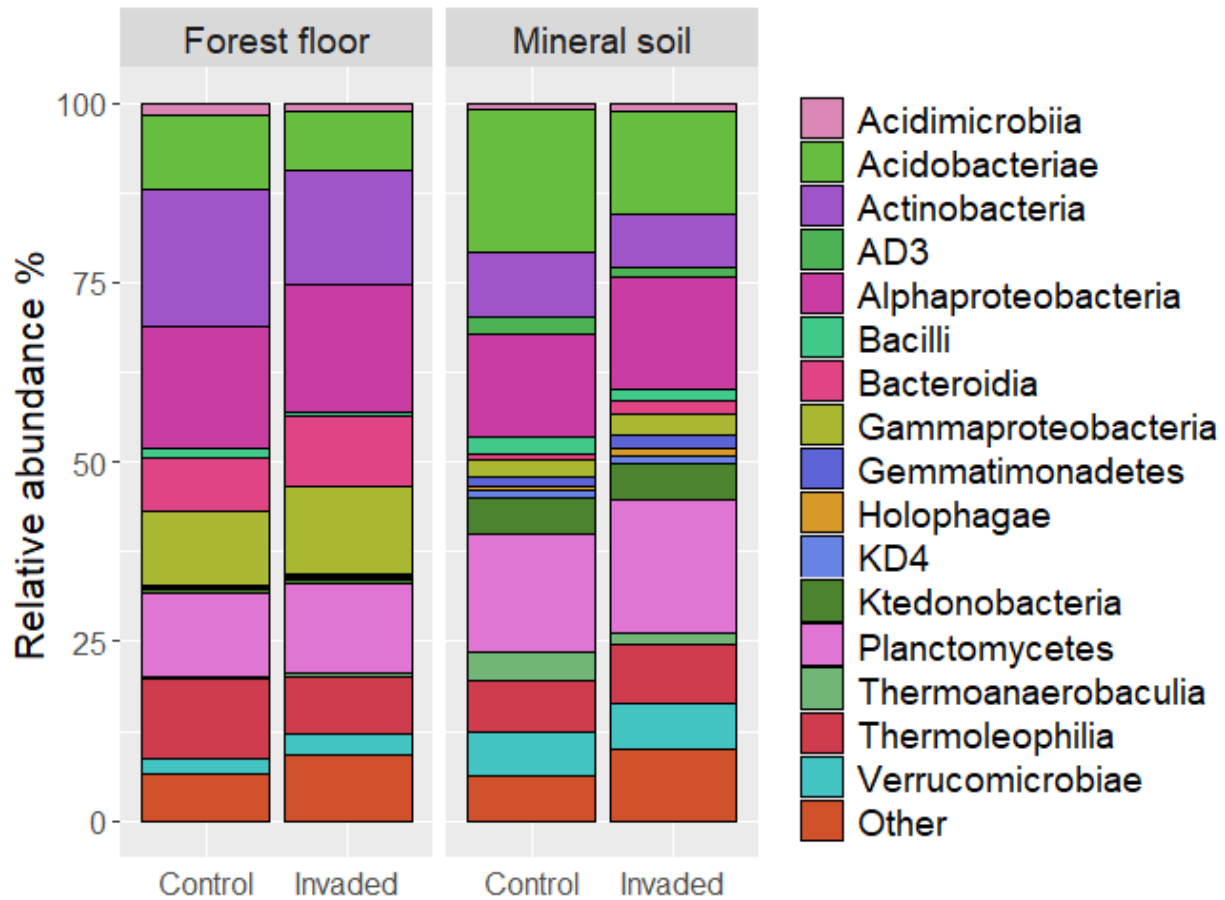

Figure S8. Average relative abundances (as number of reads) of bacterial classes representing > 1% of the number of reads in control and earthworm-invaded forest floors and mineral soils.

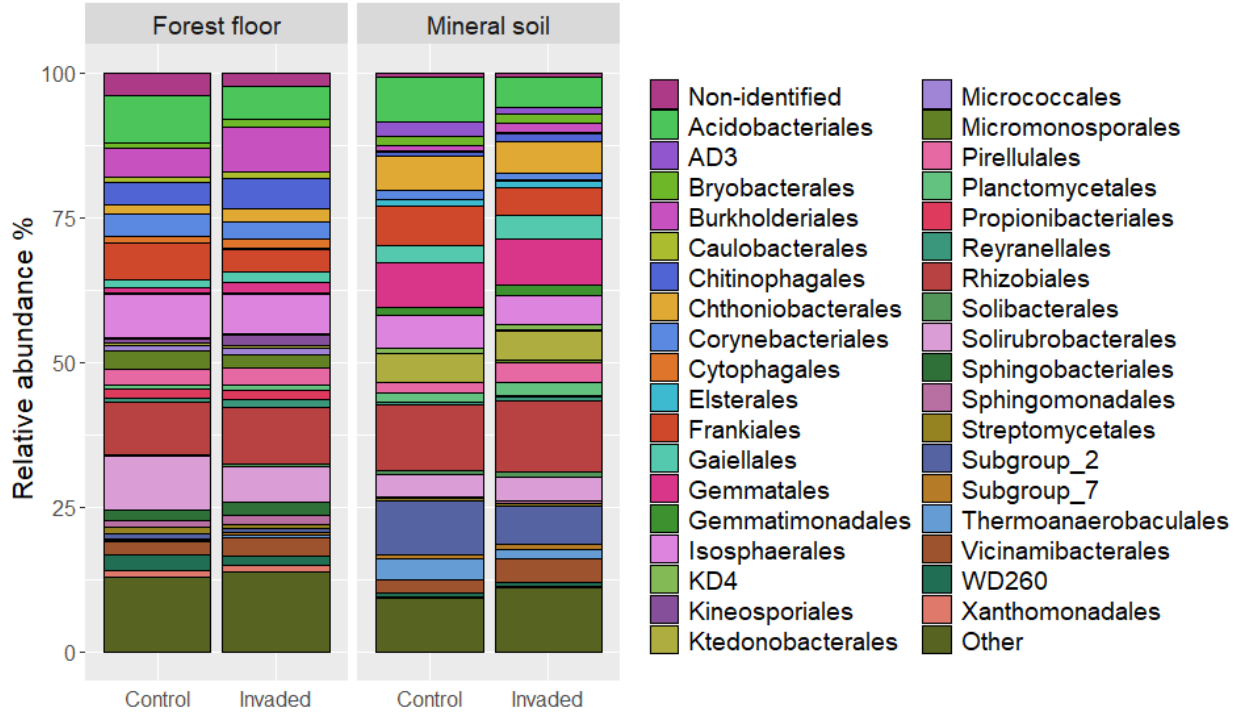

Figure S9. Average relative abundances (as number of reads) of bacterial orders representing > 1% of the number of reads in control and earthworm-invaded forest floors and mineral soils.

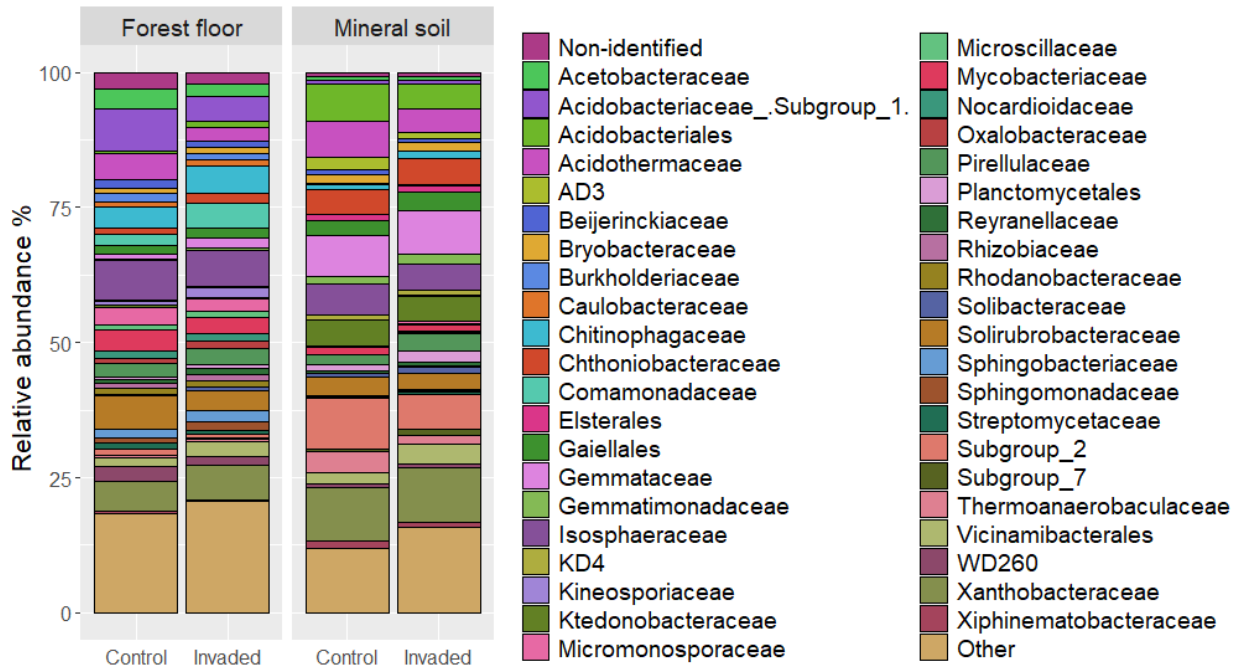

Figure S10. Average relative abundances (as number of reads) of bacterial families representing > 1% of the number of reads in control and earthworm-invaded forest floors and mineral soils.

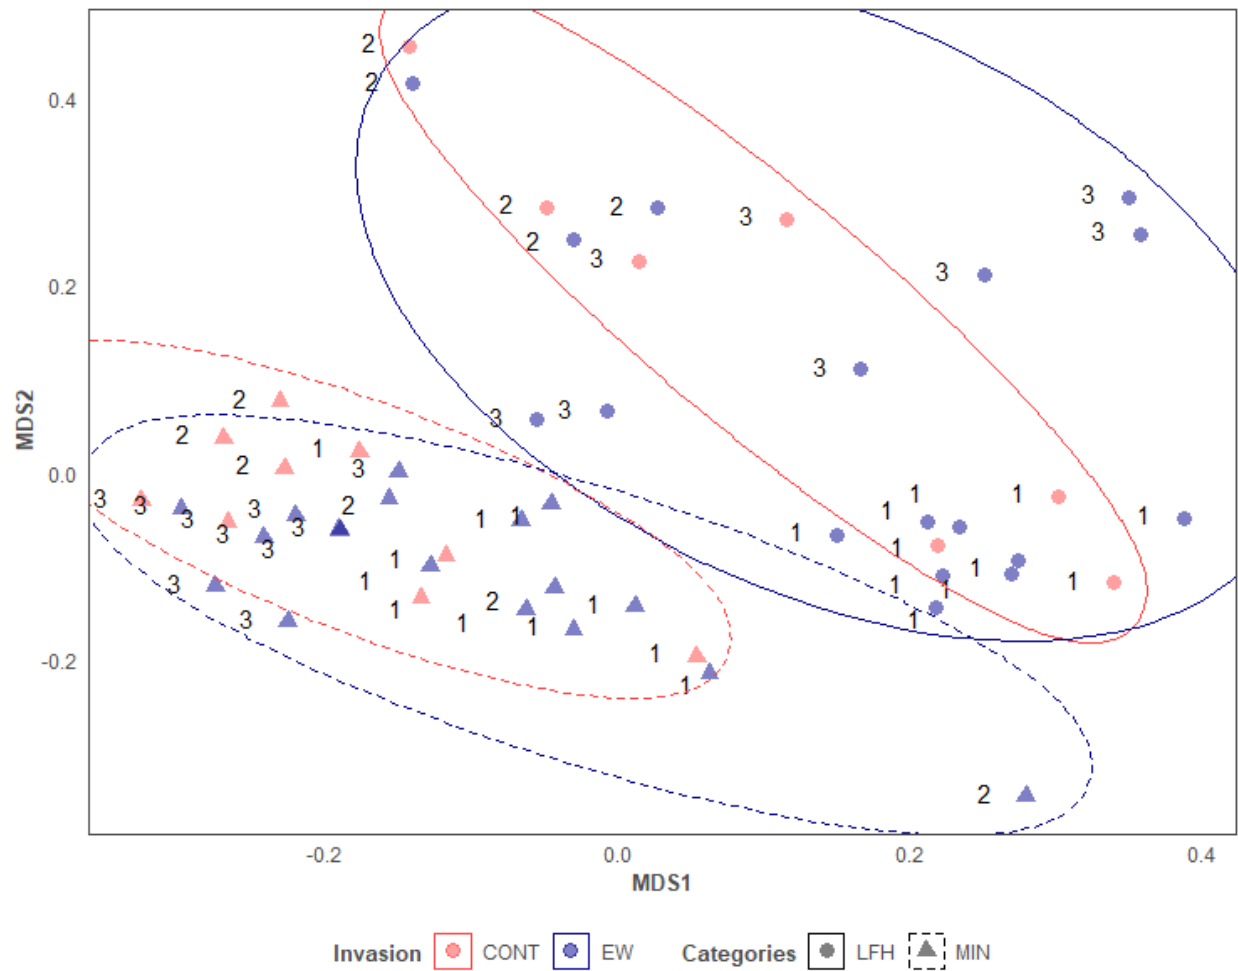

Figure S11. Non-metric multidimensional scaling of bacterial amplicon sequence variants (ASVs) using metaMDS function from the vegan package on Bray-Curtis distance matrices after Hellinger transformation of individual ASV abundance (Anderson and Willis, 2003; Legendre and Gallagher, 2001; Oksanen et al., 2019). The final stress was 0.08, non-metric fit  $R^2=0.99$  and linear fit  $R^2=0.97$ . Numbers correspond to sites: EMEND (1), Grands Jardins (2) and Valcartier (3). Earthworm invaded sites denoted by purple circles, non-invaded sites by pink circles; forest floors (LFH) represented by circles and mineral soils (MIN) by triangles.

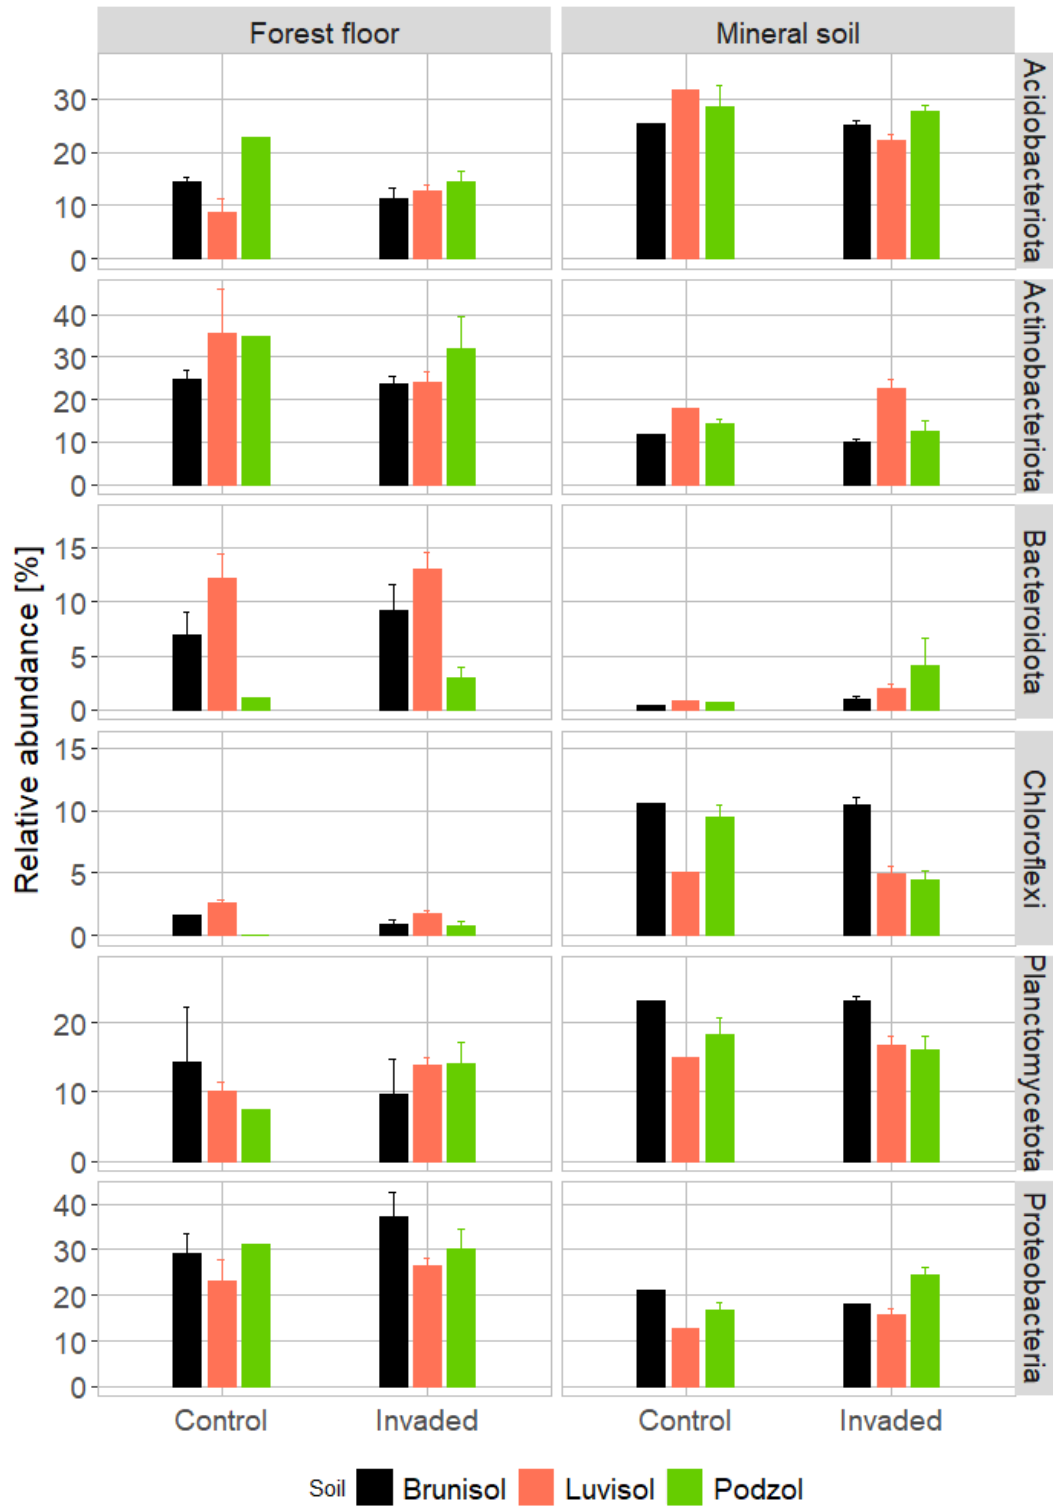

Figure S12. Average ( $\pm 1$  SE) relative abundances (as number of reads) of bacterial phyla for each individual site.

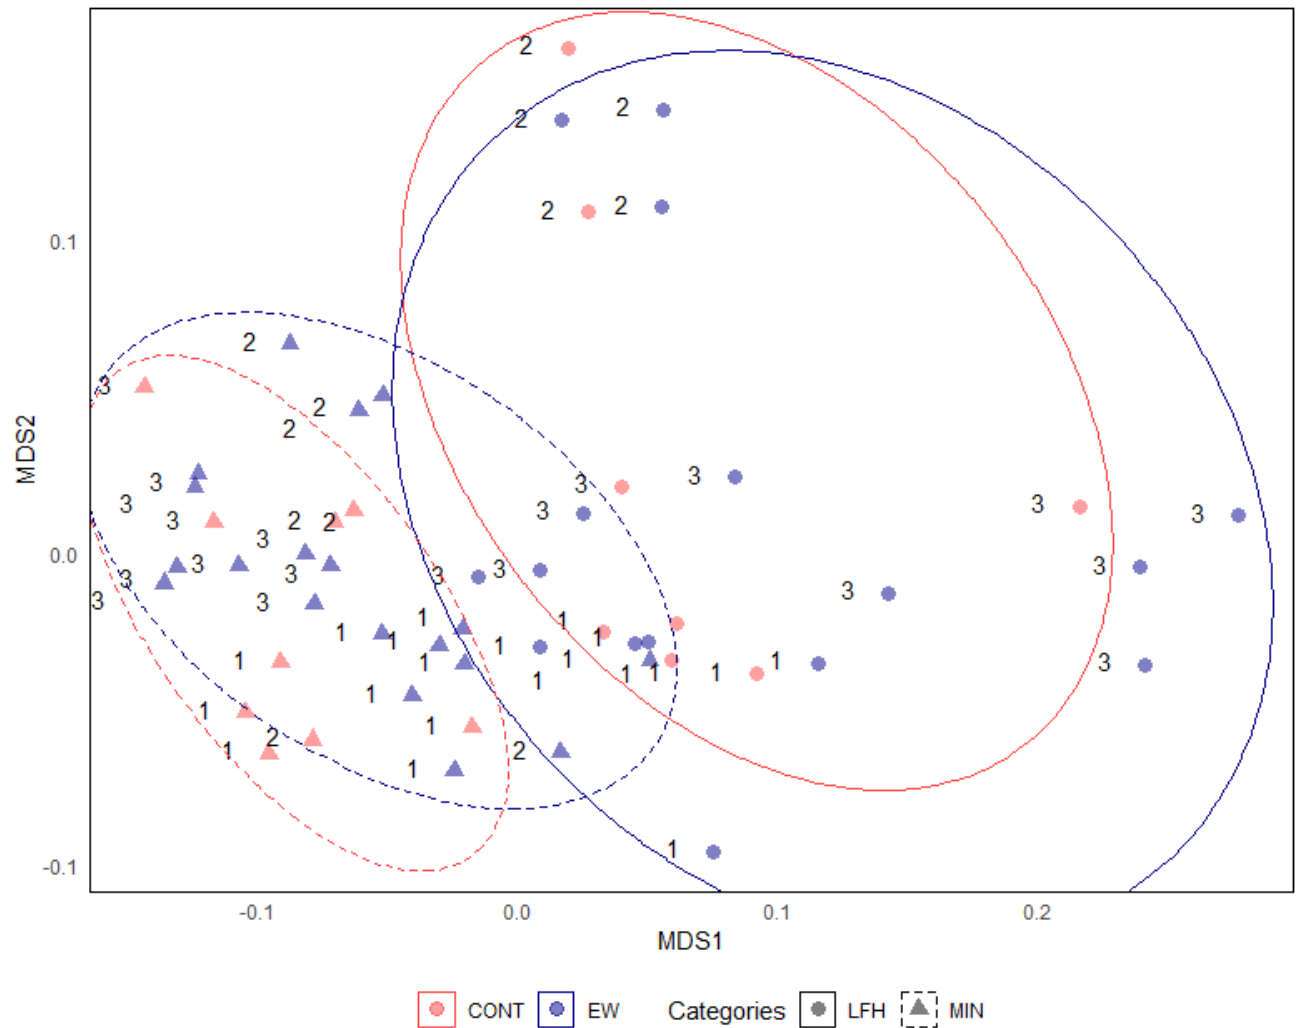

Figure S13. Non-metric multidimensional scaling of phospholipid fatty acids (PLFAs) using *metaMDS* function from the *vegan* package on Bray-Curtis distance matrices after Hellinger transformation of individual PLFA abundance (Anderson and Willis, 2003; Legendre and Gallagher, 2001; Oksanen et al., 2019). The final stress was 0.09, non-metric fit  $R^2=0.99$  and linear fit  $R^2=0.97$ . Numbers correspond to sites: EMEND (1), Grands Jardins (2) and Valcartier (3). Earthworm invaded sites denoted by purple circles, non-invaded sites by pink circles; forest floors (LFH) represented by circles and mineral soils (MIN) by triangles.

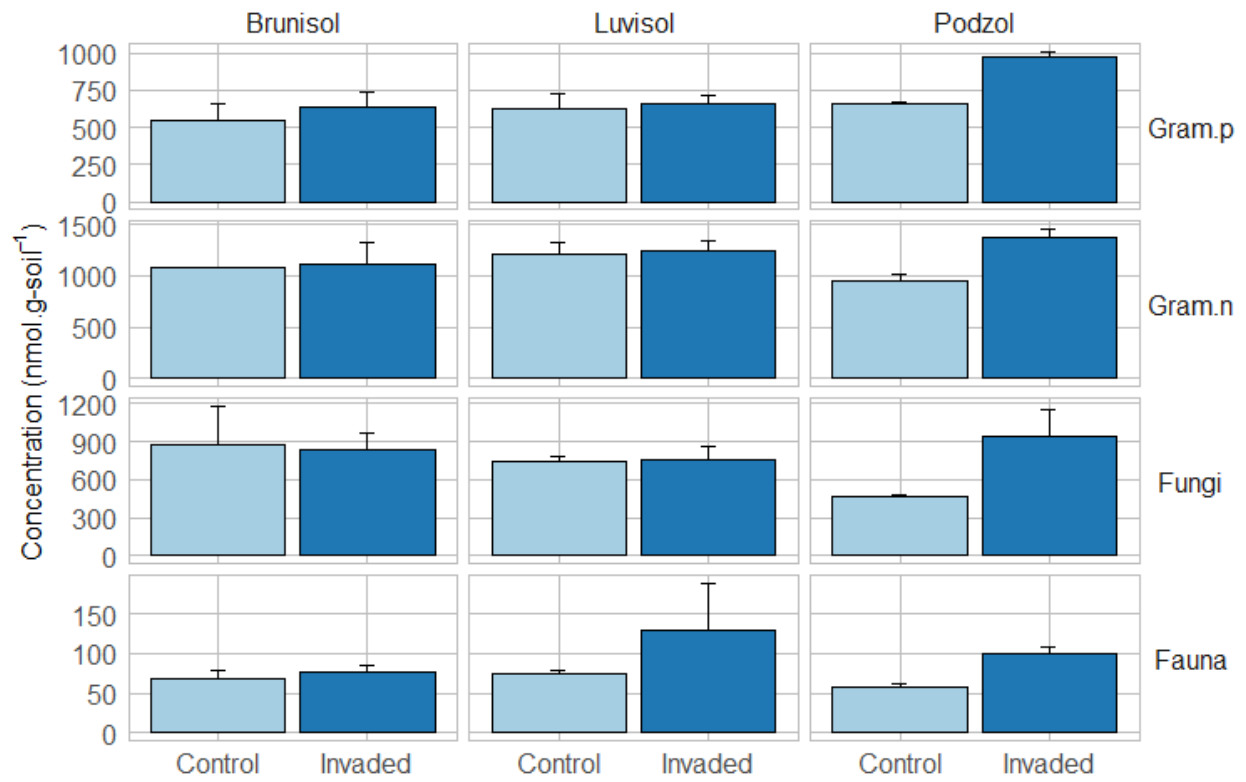

Figure S14. Average ( $\pm 1$  SE) concentrations of PLFA groups in forest floors for each individual site.

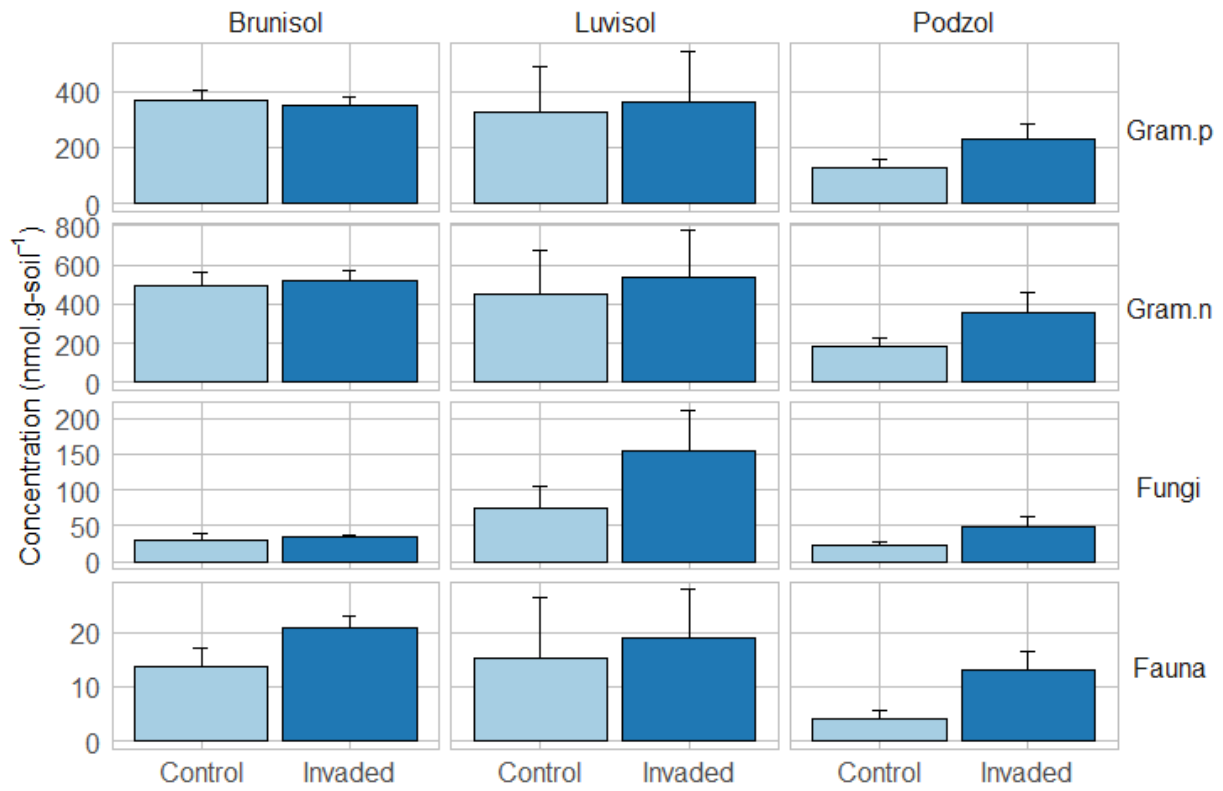

Figure S15. Average ( $\pm 1$  SE) concentrations of PLFA groups in mineral soils for each individual site.
